# Supplementary material
Source: publisher site journal article supplement (https://www.dovepress.com/article/297716)
Supplement: Supplementary file 1 [file get_supplementary_file.php]

**Supporting Information for**

**Antitumor effect of hyperoside loaded in charge reversed and mitochondria-targeted liposomes**

Yufei Feng1, Guozhao Qin1, Shuyuan Chang1, Zhongxu Jing2, Yanyan Zhang1, Yanhong Wang1*

1 Key Laboratory of Chinese Materia Medica in Ministry of Education, Heilongjiang University of Chinese Medicine, Harbin, Heilongjiang, People’s Republic of China;

2 Heilongjiang Provincial Administration of Traditional Chinese Medicine, Harbin, Heilongjiang, People’s Republic of China.

*Yanhong Wang, Professor, [799378826@qq.com,](mailto:799378826@qq.com,) 86451-87266893.

**Scheme S1. Synthesis procedure of DSPE-Lys-DMA.**





1. The 1H NMR spectrum of DSPE Lys

The 1H NMR spectrum of DSPE Lys was shown as follows: 1H NMR (400 MHz, CDCL3): δ (ppm) = 0.88 (6H, t, Hz, –CH3), 1.25 (58H, s, CH3–(CH2)14– and –CH2–CH2–CH2–CH2–NH2), 1.41 (2H, d, –CH2–CH2–CH2–CH2–NH2), 1.57 (6H, s, –CH2–CH2–CH2–CH2–NH2 and CH3–(CH2)14–CH2–), 2.29 (4H, d, CH3-(CH2)15– CH2–CH2–), 2.98 (2H, s, –CH2–CH2–CH2–CH2–NH2), 3.91, 4.10, 4.34 (6H, m, –CH2–CH(C17H35COO)CH2– PO4–CH2–), and 5.19 (1H, s, –CH2–CH(C17H35COO)CH2– PO4–CH2–). ESI Q1 MS [M+H]+ m/z calculated for C47H95N3O9 P: 876.67, found: 876.56.

1. The 1H NMR spectrum of DSPE-Lys-DMA

The 1H NMR spectrum of DSPE-Lys-DMA was shown as follows: 1H NMR(400 MHz, CDCL3): δ(ppm) = 0.88 (6H, t, –CH3), 1.26 (58H, s, CH3–(CH2)14– and –CH2–CH2–CH2–CH2–NH–C–C=C–C–OH), 1.41(2H, d, –CH2–CH2–CH2–CH2– NH–C–C=C–C–OH), 1.57 (6H, s, –CH2–CH2–CH2–CH2–NH–C–C=C–C–OH and CH3–(CH2)14–CH2–), 1.90 (12H, s, CH3–C=C–CH3), 2.29 (4H, d, CH3–(CH2)15–CH2–CH2–), 2.98 (2H, s,–CH2–CH2–CH2–CH2–NH–C–C=C–C–OH), 3.94, 4.13, and 4.36 (6H, m, –CH2–CH (C17H35COO) CH2–PO4–CH2–), and 5.20 (1H, s, –CH2–CH (C17H35COO) CH2–PO4–CH2–). ESI Q1 MS [M-H]- m/z calculated for C59H106N3O15 P: 1126.74, found: 1126.76.

Table S1 Characterization of liposomes (means ± SD, n=3)

| Name | Formulation | Size(nm) | PDI | EE(%) | DL(%) |
| --- | --- | --- | --- | --- | --- |
| SPC-Lip | SPC:PEG:CHOL=8:1.5:2 | 106.8±3.1 | 0.173±0.056 | - | - |
| SPC/HYP-Lip | SPC:PEG:CHOL:HYP=8:1.5:2:1 | 120.7±4.1 | 0.182±0.077 | 76.51±2.02 | 5.1±0.2 |
| DLD-Lip | SPC:DLD:PEG:CHOL=8:2.5:1.5:2 | 110.5±3.9 | 0.178±0.069 | - | - |
| DLD/HYP-Lip | SPC:DLD:PEG:CHOL:HYP=8:2.5:1.5:2:1 | 124.9±3.4 | 0.164±0.062 | 94.36±1.52 | 8.5±0.5 |

Note: CHOL, cholesterol; DSPE-mPEG2000, PEG; PDI, polydispersity index.

1. Identification of cellular uptake pathways

The internalization mechanisms of dual-functional liposomes (DLD-Lip) in CBRH-7919 cells were evaluated using various blockers of specific cellular endocytosis pathways, respectively 1-3. To estimate the endocytosis pathways of the DLD-Lips, CBRH-7919 cells were seeded (4 ×105 cells/well) in six-well plates in 2 ml of growth medium and cultured under 5% CO2 at 37 °C for 12 h. Then CBRH-7919 cells were pre-incubated with different specific agents for various kinds of endocytosis (inhibitor of caveolin mediated endocytosis: filipin (4.85 mg/ml); inhibitor of macropinocytosis: amiloride (1.34 mg/ml); inhibitor of clathrin-mediated endocytosis: chlorpromazine (19.55 mg/ml)) for 0.5 h at 37 °C. Subsequently, the HYP loaded dual functional liposomes (DLD/HYP-Lips) were diluted in culture medium to reach a final HYP concentration of 0.5 μg/mL. After incubation at 37 °C for 4 h, collected cell pellets were washed twice with cold PBS and the fluorescence intensity was determined by flow cytometer.

As shown in Figure S1, all of the cellular uptake of DLD/HYP-Lip decreased remarkably in the presence of amiloride (p < 0.05), an inhibitor of macropinocytosis, and similar phenomena was observed in the presence of chlorpromazine, an inhibitor of clathrin-mediated endocytosis. In contrast, the presence of filipin, an inhibitor of caveolin-mediated endocytosis, had no significant effect on the cellular uptake of DLD/HYP-Lip. It was speculated that DLD-Lips would enter the cells initially in macropinosomes and clathrincoated vesicles by macropinocytosis and clathrindependent endocytosis, respectively, and both further in endosomes/lysosomes. Owing to DLD conjugate containing lysines, DLD-Lips might perform the proton sponge effect similar to polyethylenimine (PEI) which leading to the swelling and disruption of the endosomes/lysosomes for cytoplasmic liberation of the intact liposomes 4, 5. It is noteworthy that internalization through macropinocytosis is more efficient than that through clathrinmediated endocytosis, since more porous membrane structure of macropinosomes can enhance leakage of inclusions into cytoplasm compared with clathrin-coated naocarriers, in terms of avoiding endosomal/lysosomal degradation 6, 7.


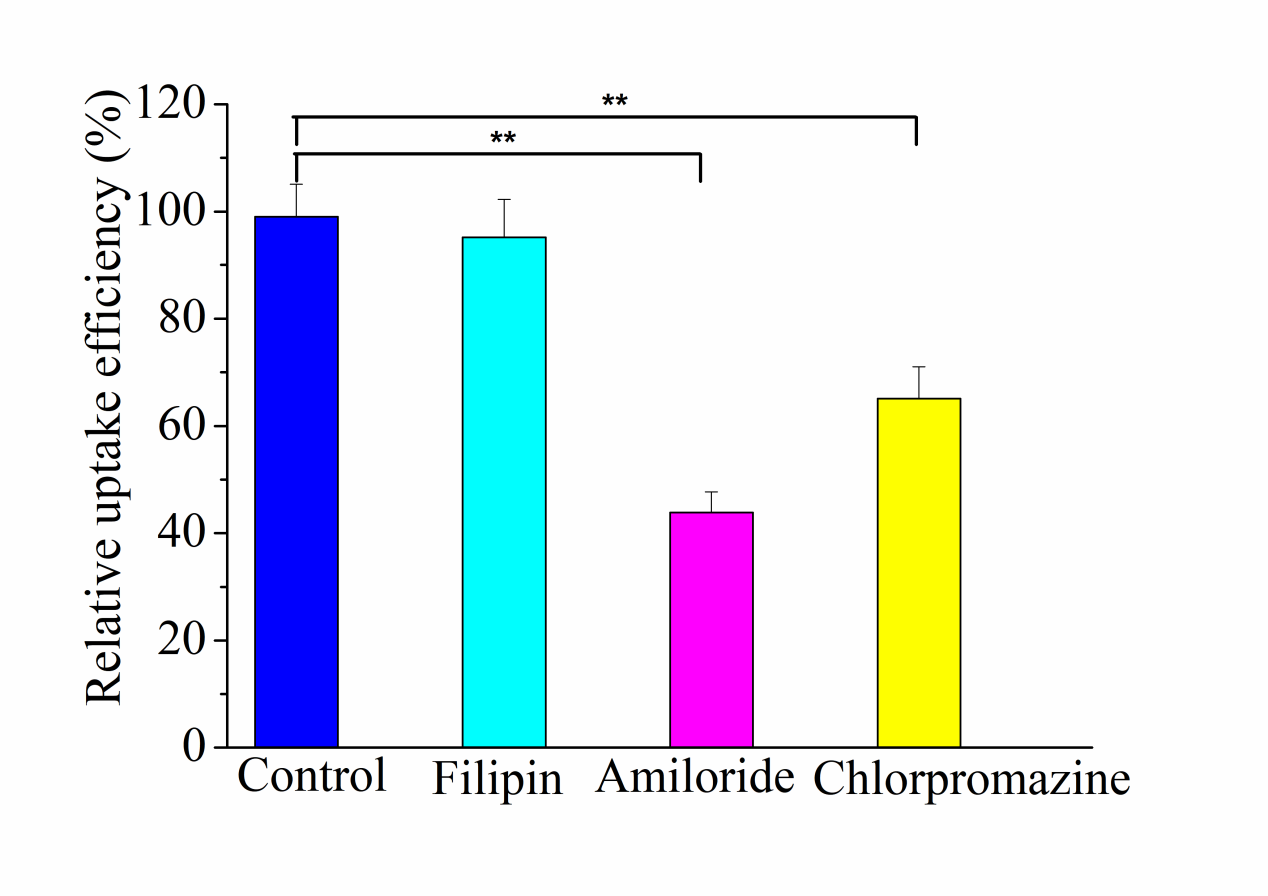


**Figure S1** Cellular uptake of HYP-loaded liposomes in CBRH-7919 cells. The endocytosis inhibition assay on CBRH-7919 cells. Data are presented as means ± SD (n=3), **p < 0.01.

1. The content of HYP in the mitochondria of tumor tissue

After the establishment of the animal tumor model, mice were randomly assigned into four groups (n=5). Saline, HYP (6.0 mg/kg), SPC/HYP-Lip (6.0 mg/kg, calculated by HYP content), or DLD/HYP-Lip (6.0 mg/kg, calculated by HYP content) was administrated via tail vein injection. Different formulations were injected at 12 days after CBRH-7919 cells injection. Mice were sacrificed after 24 h treatment and tumors were removed, extract the mitochondria of the tumor according to the tissue mitochondrial extraction kit, content of HYP in mitochondria of tumor tissue was determined by HPLC.

Results were shown in the Figure S2, the content of HYP in tumor tissue mitochondria in the DLD/HYP-Lip administration group was significantly higher than saline group, HYP and SPC/HYP-Lip group. The results showed that DLD/HYP-Lip could be enriched in the mitochondria of the cells, which enhances the toxicity of DLD/HYP-Lip to tumor cells.





**Figure S2** Quantification of HYP content in the mitochondria of tumor tissue using HPLC analysis after 24 h treatment. Data are presented as means±SD (N=3), **p<0.01.

1. Endosomal escape experiment

In order to prove the potential of the prepared mitochondrial targeting DLD/HYP-Lip in tumor treatment, the endosomal escape of the mitochondrial part was studied by confocal fluorescence microscopy. Confocal laser scanning microscope was used to evaluate the cell body escape ability of DLD/HYP-Lip on CBRH-7919 cells. Cells (1×104 cells/well) were seeded on glass bottom culture dishes (Φ15 mm; Nest, China). After incubating for 24 h, treat with DLD/HYP-Lip for 2 h, and then replace the culture medium with fresh medium. The cells were cultured for another 1, or 4 hours, then washed twice with cold PBS, and stained with LysoTracker Green (100 Nm) for 30 min at 37°C. The stained cells were rinsed 3 times with PBS, and then observed with a laser confocal microscope. As shown in Figure S3, as the incubation time increases, more particles are released into the cytoplasm (red dots in the merged image), indicating that liposomes escape from the lysosome. The results showed that DLD/HYP-Lip could successfully target mitochondria, and DLD played a vital role in the targeting process. The DLD conjugate lysine residues, which could produce a proton sponge effect similar to that produced by polyethylenimine, leading to swelling and disruption of endosomes and the liberation of intact liposomes8, 9.


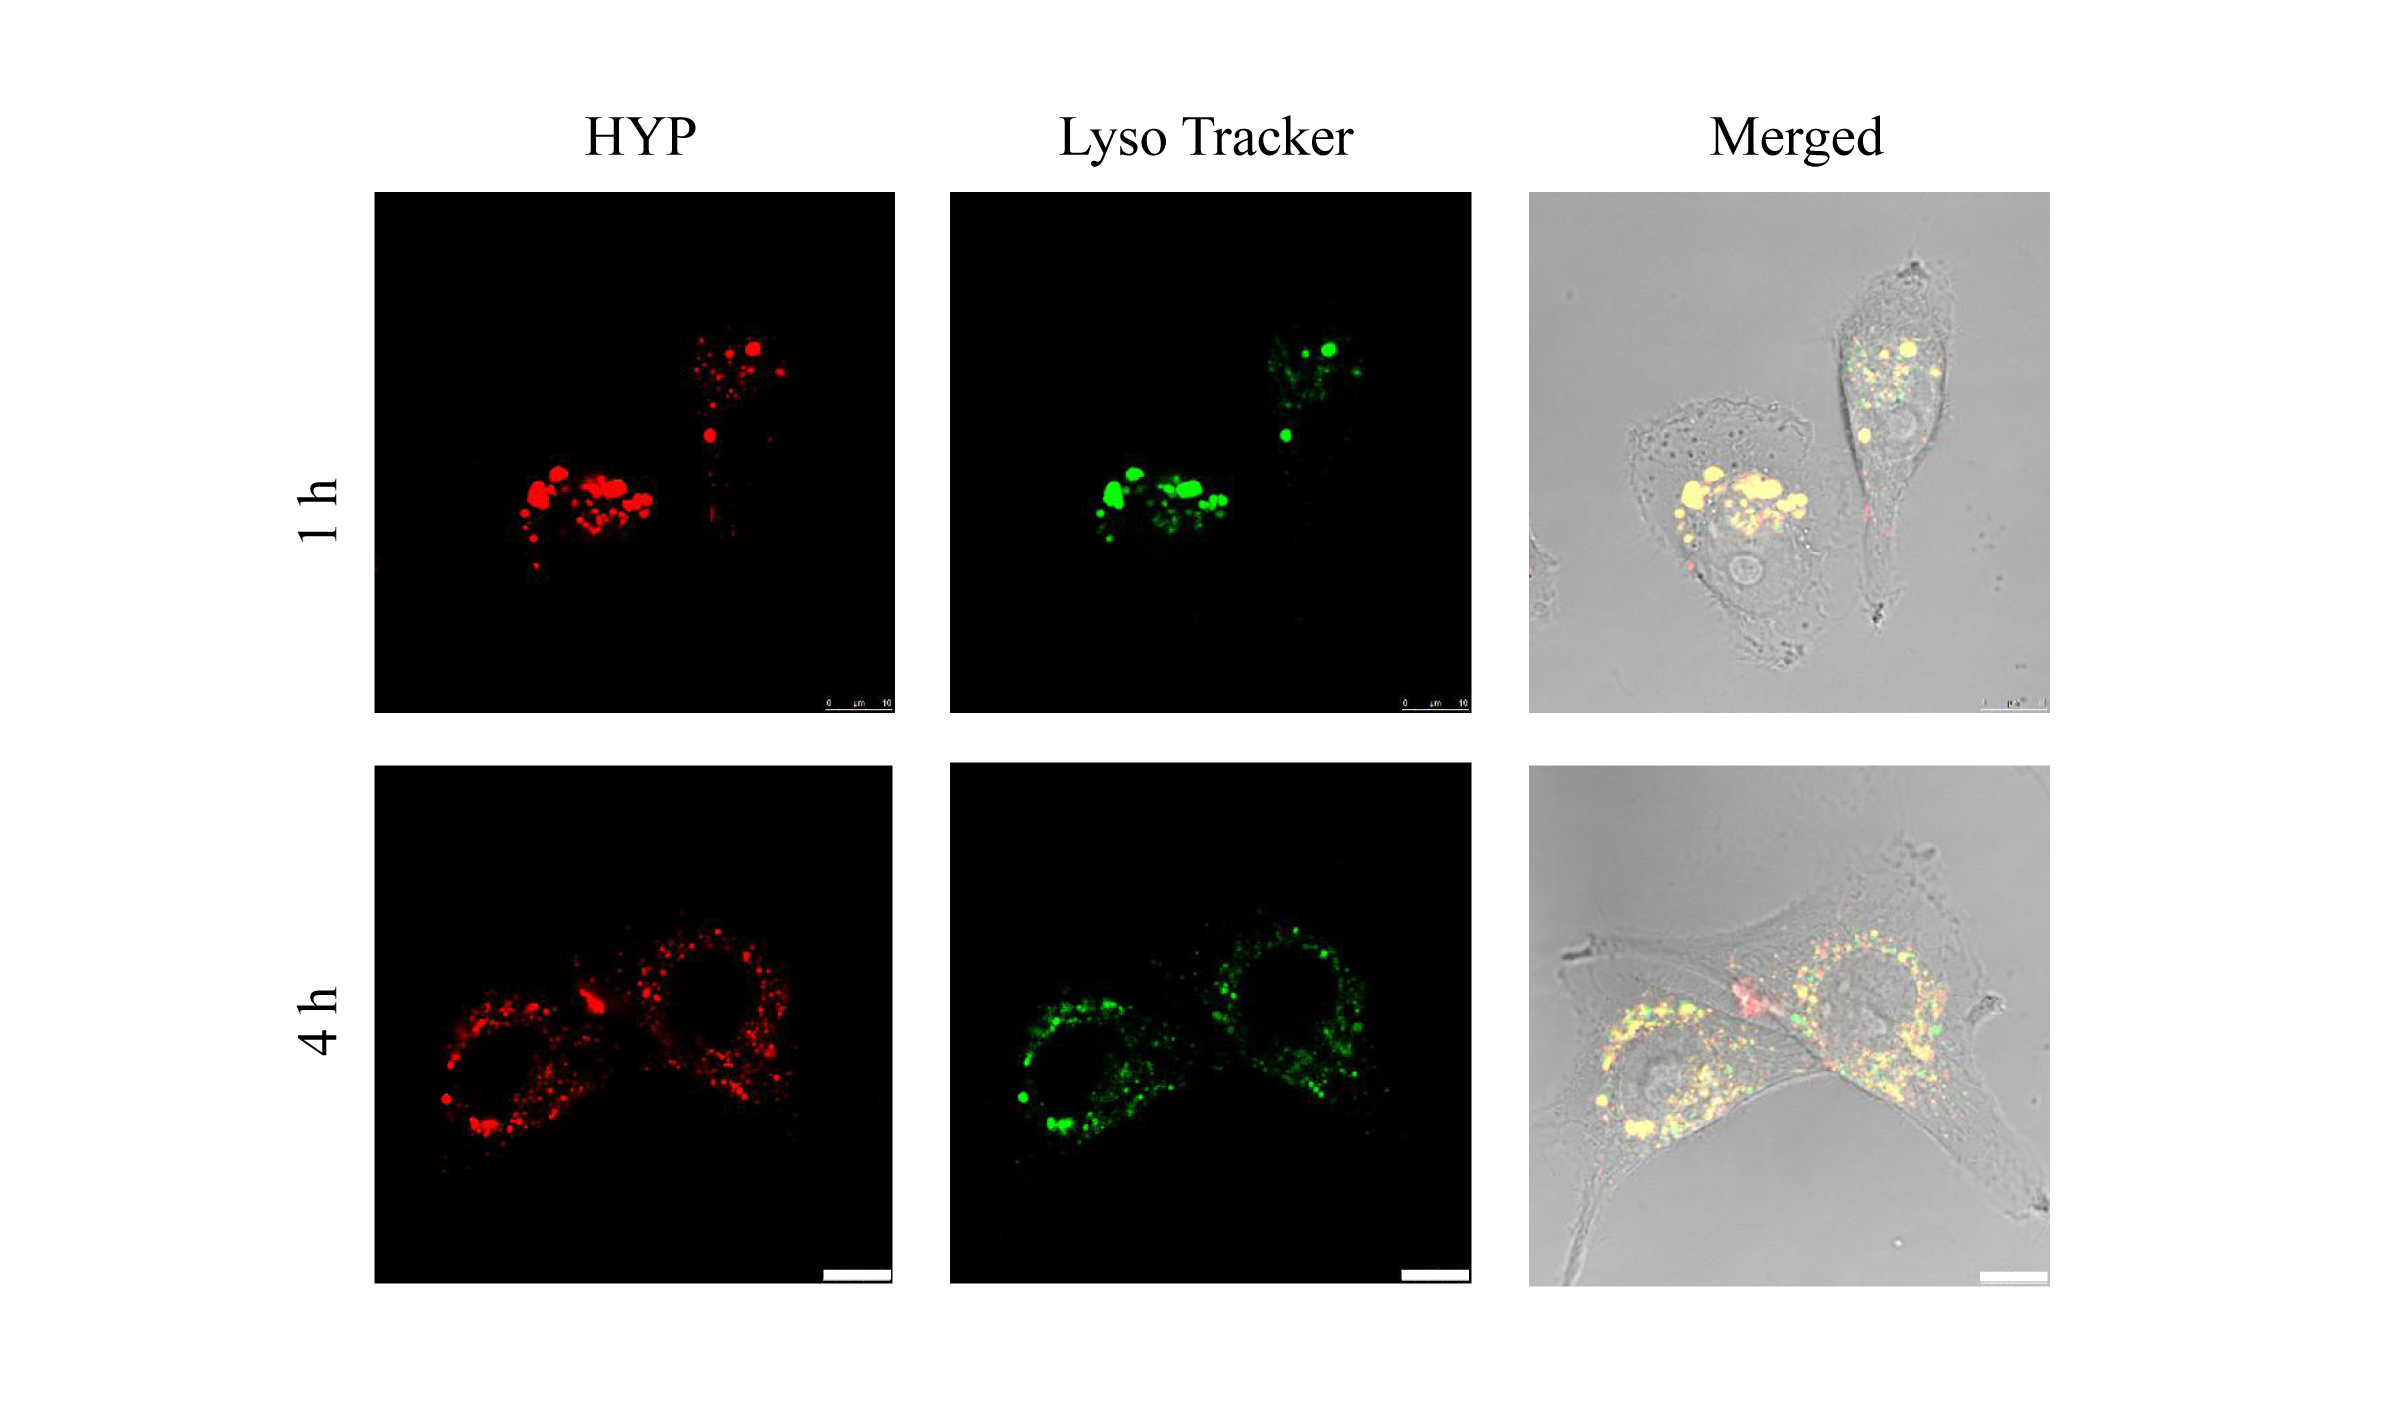


**Figure** **S3** The escape ability of DLD/HYP-Lip in CBRH-7919 cells. Note: CBRH-7919 cells were incubated with DLD/HYP-Lip for 2 hours, then cultured for 1, 4 hours, and stained with LysoTracker Green for 30 minutes. The yellow spots in the merged picture indicate that liposomes coexist in the inner membrane chamber. The scale bar represents 10 μm.

**Reference**

1. Jesus MBD, Kapila YL. Cellular mechanisms in nanomaterial internalization, intracellular tr- afficking, and toxicity. *Nanotoxicology*. 2014;201-227.

2. Jiang L, Li L, He XD, et al. Overcoming drug-resistant lung cancer by paclitaxel loaded d-ual-functional liposomes with mitochondria targeting and pH-response. *Biomaterials*. 2015;52:126-139.

3. Sun JW, Jiang L, Lin Y, et al. Enhanced anticancer efficacy of paclitaxel through multistagetumor-targeting liposomes modified with RGD and KLA peptides. *Int. J. Nanomed*. 2017;12:1517-1537.

4. Sun XY, Chen JL, Chen HL, et al. Polyethylenimine modified liposomes as potential carrie-rs for antitumor drug delivery in vitro. *Pharmazie*. 2012;67(5):426-431.

5. Sun XY, Chen JL, Gu XH, et al. Efficacy and toxicity of cisplatin liposomes modified withpolyethylenimine. *Die Pharmazie*. 2014;69(4):281-286.

6. Nakase I, Noguchi K, Aoki A, et al. Arginine-rich cell-penetrating peptide-modified extracel-lular vesicles for active macropinocytosis induction and efficient intracellular delivery. [*Sci. Rep*](https://www.nature.com/srep). 2017;7(1):1991.

7. Paliwal SR, Paliwal R, Agrawal GP, et al. [Hyaluronic acid modified pH-sensitive liposomes for targeted intracellular delivery of doxorubicin.](http://www.tandfonline.com/doi/abs/10.3109/08982104.2015.1117489) [*J. Liposome Res*](https://xueshu.baidu.com/usercenter/data/journal?cmd=jump&tn=SE_baiduxueshu_c1gjeupa&ie=utf-8&sc_f_para=sc_hilight=publish&sort=sc_cited&wd=journaluri:(d718df1b1dffed66)%20Journal%20of%20Liposome%20Research). 2016;26(4):276-287.

8. He JX, Xu SH, Mixson AJ. The multifaceted histidine-based carriers for Nucleic Acid deliv-ery: Advances and Challenges. *Pharm.* 2020;12(8):774.

9. Penacho N, Simoes S, Lima MCPD. Polyethylenimine of various molecular weights as adju-vant for transfection mediated by cationic liposomes. *Mol. Membr. Biol.* 2009;26(4):249-263.
